# Supplementary material for: ‘Candidatus Phytoplasma mali’ SAP11-Like protein modulates expression of genes involved in energy production, photosynthesis, and defense in Nicotiana occidentalis leaves
Source: PubMed Central journal article supplement (PMC11089699; doi:10.1186/s12870-024-05087-4), 2024-05-13
Supplement: 12870_2024_5087_MOESM5_ESM.pdf [file 12870_2024_5087_MOESM5_ESM.pdf]

Upregulated

BP

MF

CC

ctrlinf - SAP11CaPm

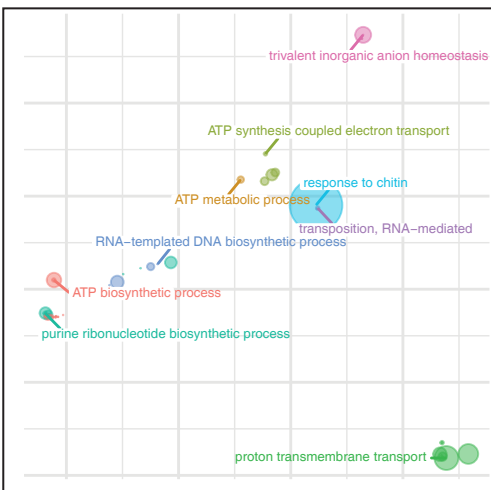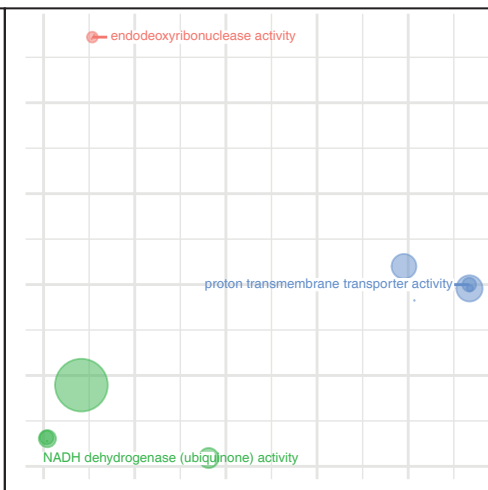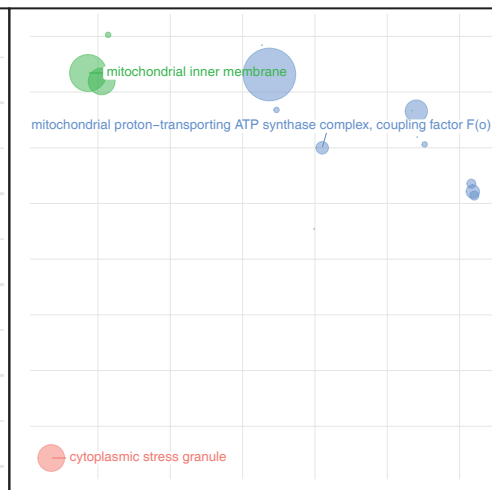

noic - ctrlinf

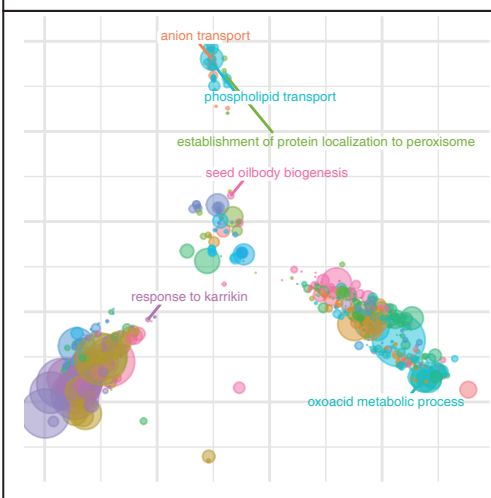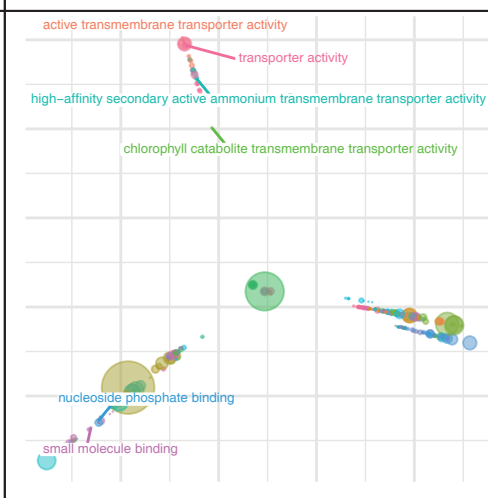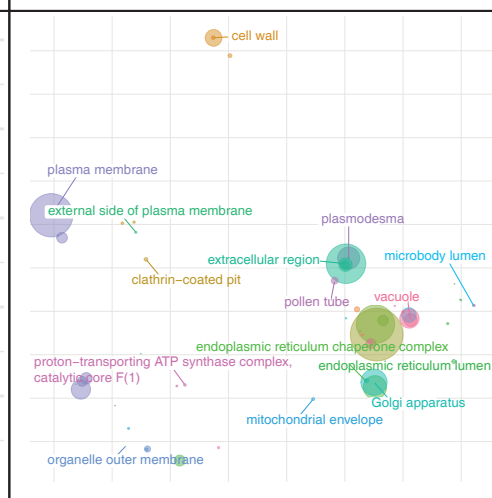

Downregulated

ctrlinf - SAP11CaPm

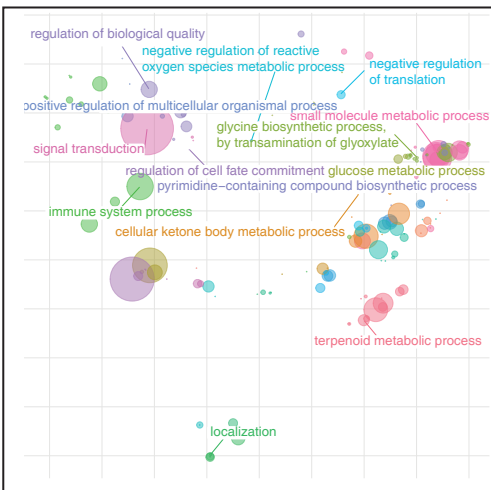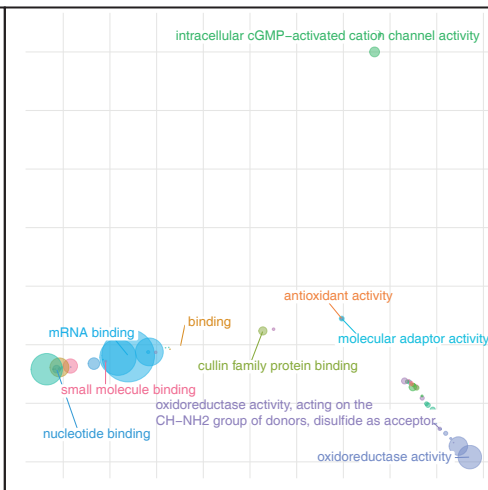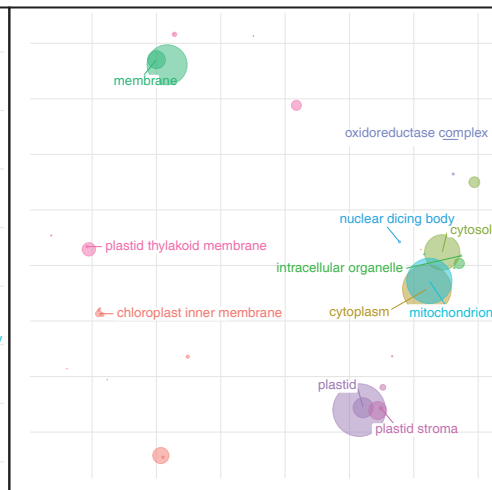

noic - ctrlinf

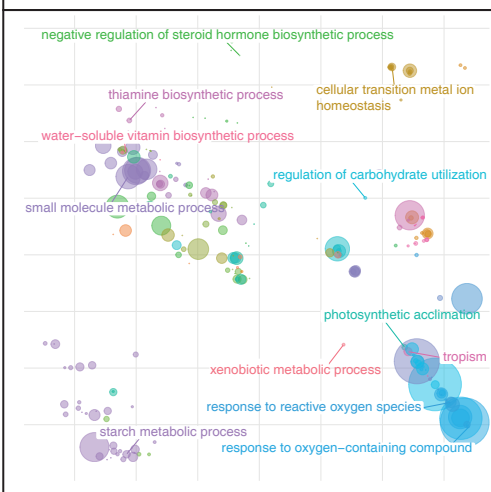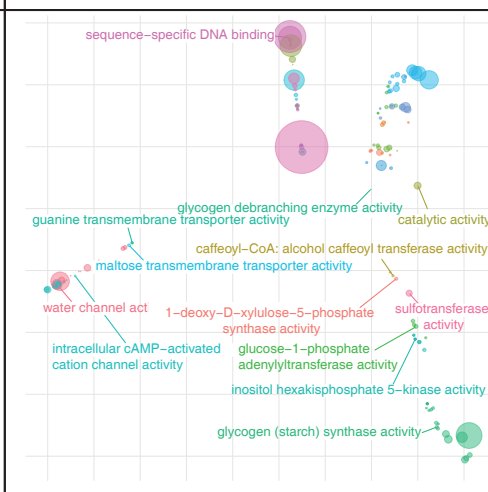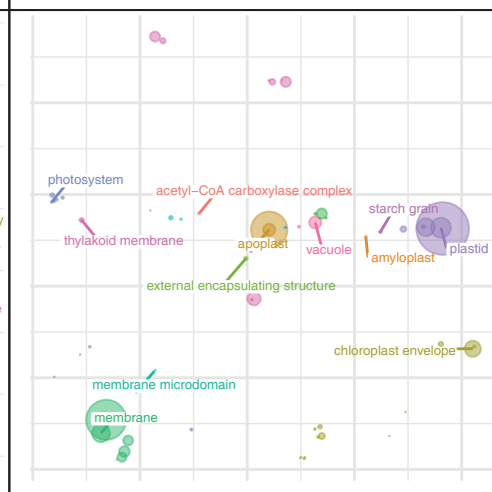

Additional File 2: Scatter Plot of GO terms. Scatter plot depicting groups and distance between terms plotted using rrvgo package.
